# Supplementary material
Source: HighWire-hosted journal article supplement (https://rapm.bmj.com/content/44/2/143)
Supplement: inline-supplementary-material-2 [file inline-supplementary-material-2.docx]

| **APPENDIX 2. Oxford Centre for Evidence-Based Medicine 2011 Levels of Evidence** | | |
| --- | --- | --- |
| **Levels of Evidence for Treatment Benefits / Does this Intervention Help?** | | |
|  | Level 1 | Systematic review of randomized trials or *n*-of 1 trials |
|  | Level 2 | Randomized trial or observational study with dramatic effect |
|  | Level 3 | Non-randomized controlled cohort/follow-up study |
|  | Level 4 | Case-series or case-control studies, or historically controlled studies |
|  | Level 5 | Mechanism-based reasoning |
|  |  |  |
| From the Oxford Centre for Evidence-Based Medicine. Available at: http://www.cebm.net/index.aspx?o=5653. Accessed March 2, 2015. | | |
